# Supplementary material for: La certificación de AENOR, una apuesta por la competitividad y la estabilidad
Source: HighWire-hosted journal article supplement (doi:10.1136/rmdopen-2021-001938), 2004-01-01
Supplement: rmdopen-2021-001938supp001_data_supplement.pdf [file rmdopen-2021-001938supp001_data_supplement.pdf]

Leung et al. Impact of pain sensitization on the Quality of life of patients with knee osteoarthritis

**Supplementary Table 1. Spearman's correlations between measurement of central sensitization and QoL outcomes**

|                              | Spearman's Rho               |                    |                 |
|------------------------------|------------------------------|--------------------|-----------------|
|                              | Number of painful body sites | PPT <sub>arm</sub> | PainDETECT      |
| Number of painful body sites | 1.000                        | -0.092             | <b>0.228**</b>  |
| PPT <sub>arm</sub>           | -0.092                       | 1.000              | -0.018          |
| PainDETECT                   | <b>0.228**</b>               | -0.018             | 1.000           |
| age                          | 0.003                        | -0.056             | <b>-0.206**</b> |
| BMI                          | 0.049                        | -0.053             | 0.021           |
| KL grade of index knee       | 0.004                        | -0.097             | -0.041          |
| WOMAC pain                   | <b>0.252**</b>               | -0.082             | <b>0.506**</b>  |
| WOMAC function               | <b>0.253**</b>               | <b>-0.131*</b>     | <b>0.498**</b>  |
| PCS                          | -0.103                       | <b>0.183**</b>     | <b>-0.239**</b> |
| MCS                          | <b>-0.294**</b>              | <b>0.158*</b>      | <b>-0.195**</b> |

\*p<0.05; \*\*p<0.01; Bold: statistically significant associations.

PPT<sub>arm</sub>: pressure pain threshold taken at volar side of right forearm; KL: Kellgren-Lawrence grading; SF-36: Medical Outcome Survey Short-form 36; PCS: physical component summary; MCS: mental component summary; WOMAC: Western Ontario and McMaster University Index.
